# Supplementary material for: Rational design and easy fabrication of transparent photothermal/hygroscopic composite coatings with long-lasting antifogging performance under sunlight activation
Source: Royal Society of Chemistry journal article supplement (doi:10.1039/d3nr05855g), 2024-01-01
Supplement: d3nr05855g1.pdf [file d3nr05855g1.pdf]

## Supporting Information

### **Rational Design and Easy Fabrication of Transparent Photothermal/hygroscopic Composite Coatings with Long-lasting Antifogging Performance under Sunlight Activation**

Jinyue Ma,<sup>a,b</sup> Xiuxian Gu,<sup>a,c</sup> Junhui He<sup>\*,a</sup>

<sup>a</sup> *Functional Nanomaterials Laboratory, Center for Micro/Nanomaterials and Technology, and Key Laboratory of Photochemical Conversion and Optoelectronic Materials, Technical Institute of Physics and Chemistry, Chinese Academy of Sciences, Beijing 100190, China*

<sup>b</sup> *School of Chemical and Environmental Engineering, China University of Mining and Technology (Beijing), Beijing 100083, China*

<sup>c</sup> *University of Chinese Academy of Sciences, Beijing 100049, China*

\* Corresponding author. E-mail: [jhhe@mail.ipc.ac.cn](mailto:jhhe@mail.ipc.ac.cn). Tel/Fax: +86 10 82543535

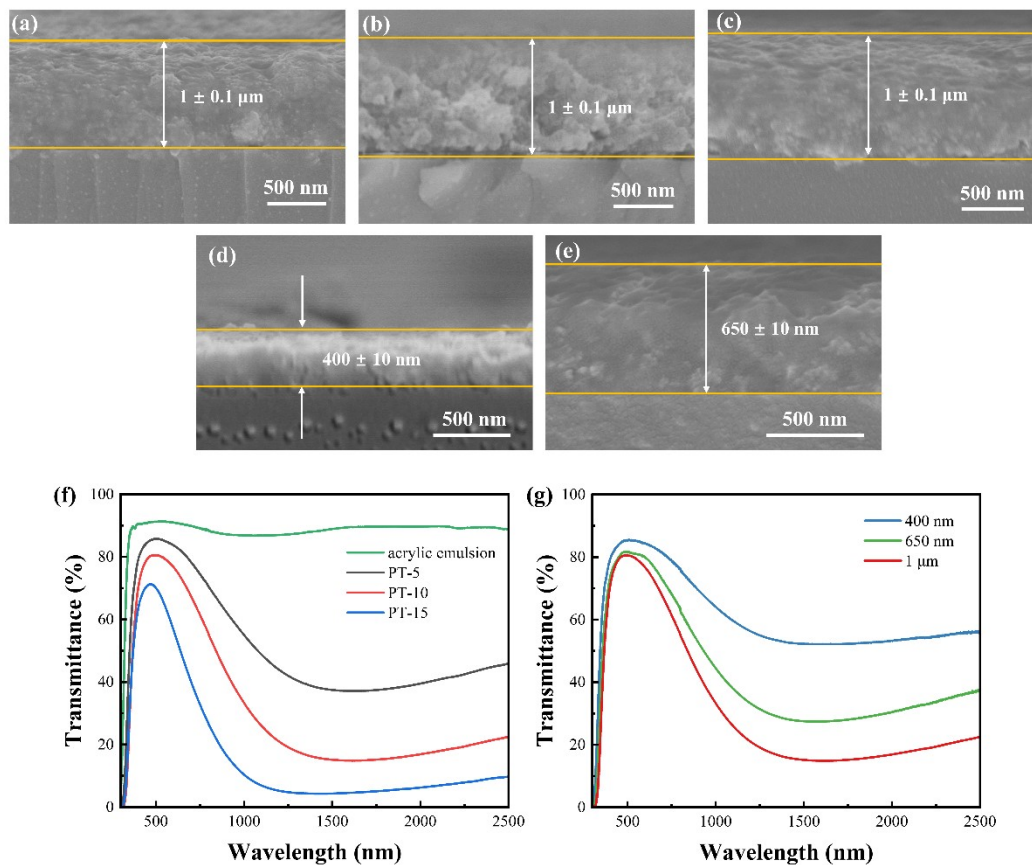

**Figure S1** Cross-section SEM images of PT-5 (a), PT-10 (b) and PT-15 (c) and coatings with a  $\text{Cs}_x\text{WO}_3$  mass fraction of 10 wt% but varied thicknesses (d, e). Transmission spectra of PT layers (f) with varied mass fractions of  $\text{Cs}_x\text{WO}_3$  nanoparticles but the same thickness of ca. 1  $\mu\text{m}$  and (g) with varied thicknesses.

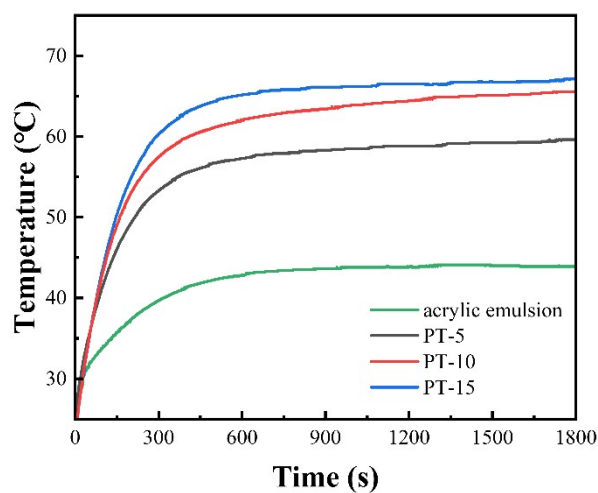

**Figure S2** Temperature response of PT layers with varied mass fractions of  $\text{Cs}_x\text{WO}_3$  nanoparticles but the same thickness of ca. 1  $\mu\text{m}$  under 1-sun illumination.

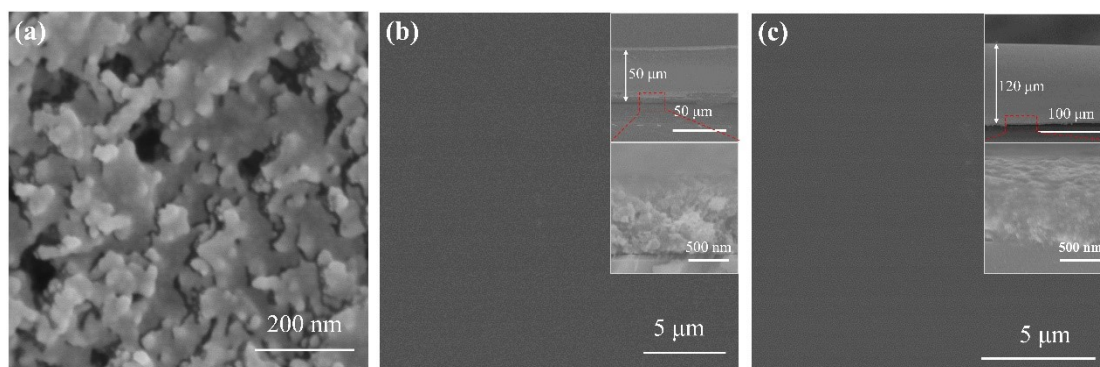

**Figure S3** SEM images of (a) the PT layer surface, (b, c) the PTH composite coating surfaces with different thicknesses, insets are cross-section SEM images.

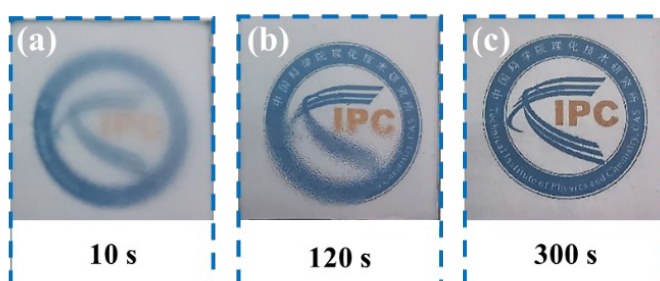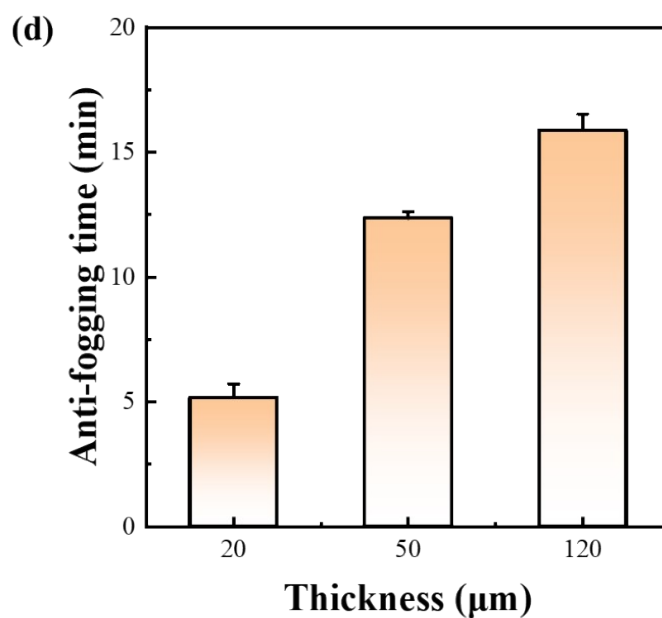

**Figure S4** (a-c) Digital photos of PT layer over time during hot steam antifogging test. (d) Antifogging duration of H layers with varied thicknesses.

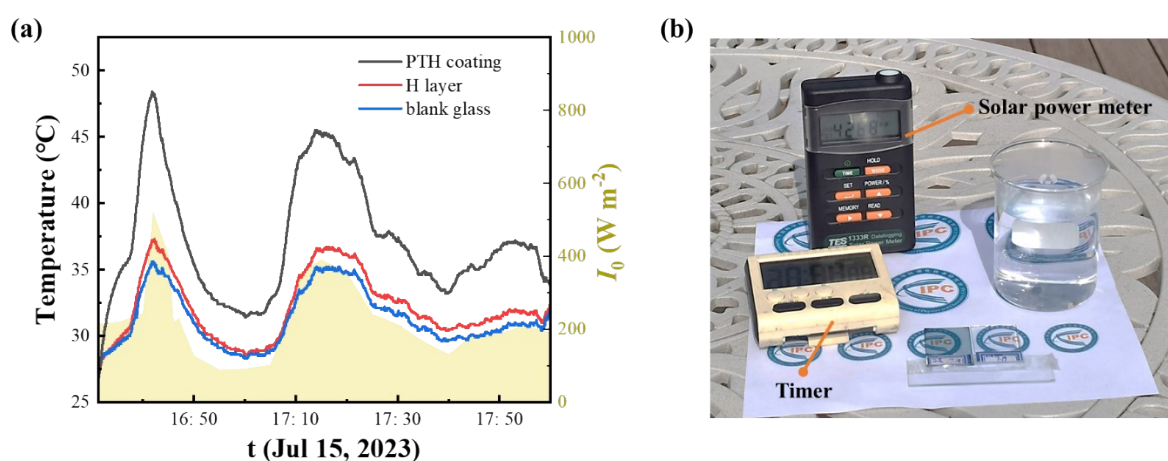

**Figure S5** (a) Temperature variation of PTH coating outdoors during a cloudy dusk ( $T_{\text{amb}} \approx 31.2^\circ\text{C}$ ,  $\text{RH} \approx 33\%$ ). (b) Schematic diagram of the setup for outdoor antifogging tests.

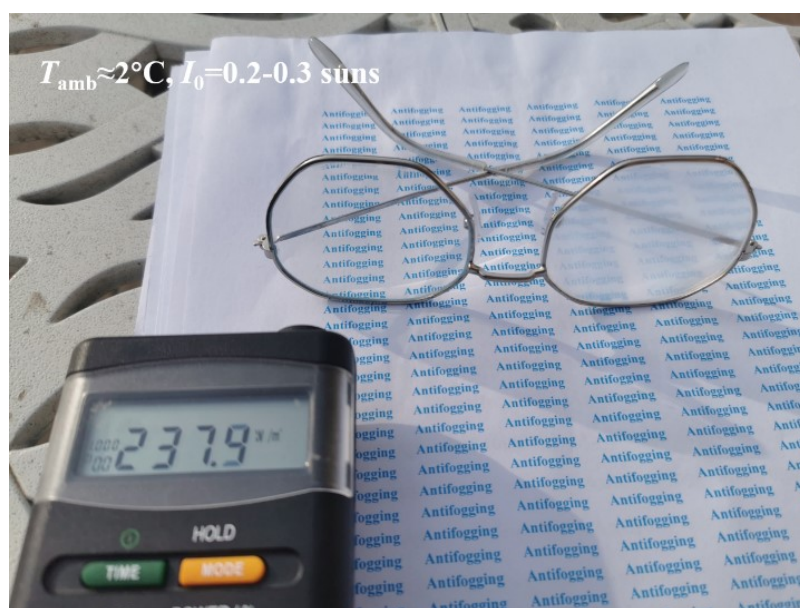

**Figure S6** Comparison of antifogging performance of coated and uncoated eyeglass lenses.

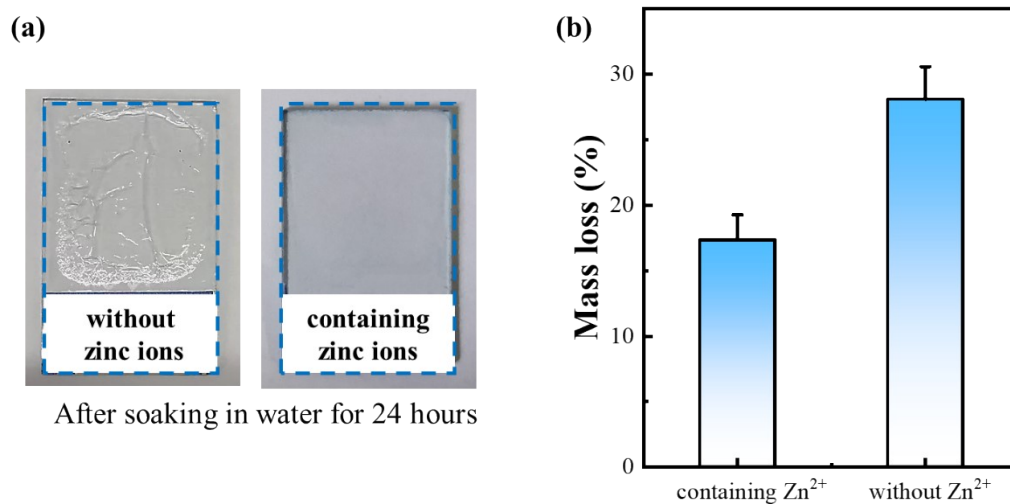

**Figure S7** (a) Appearance and (b) percentage mass loss of coatings after soaking in water for 24 h, whose H layer was coated with and without zinc ions on the same bottom PT layer.

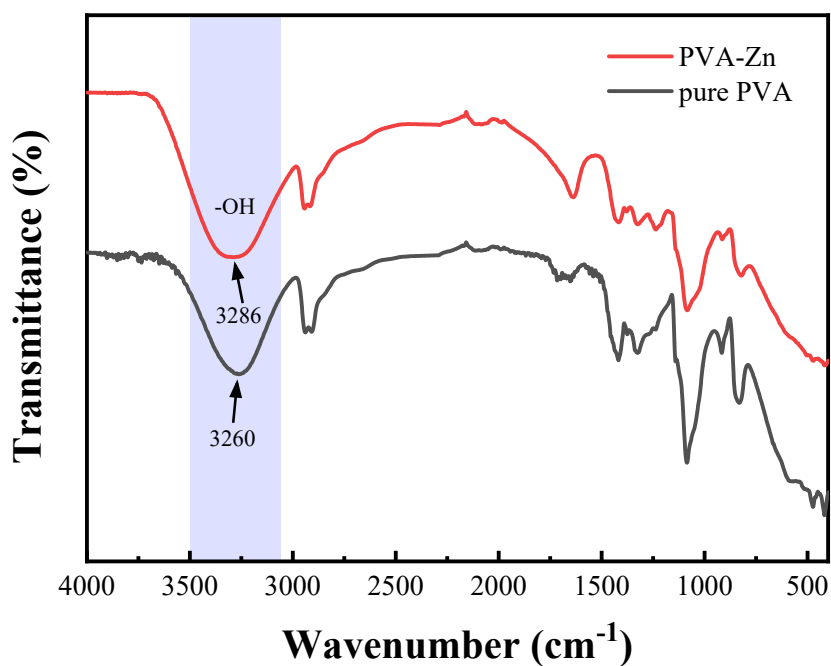

**Figure S8** ATR-FTIR spectra of the H layers with and without zinc ions.
